# Supplementary material for: Ibrutinib Plus RCHOP versus RCHOP Only in Young Patients with Activated B-Cell-like Diffuse Large B-Cell Lymphoma (ABC-DLBCL): A Cost-Effectiveness Analysis
Source: MDPI journal article supplement (doi:10.3390/curroncol30120764), 2023-12-15
Supplement: s1 [file s1]

## Supplementary Materials

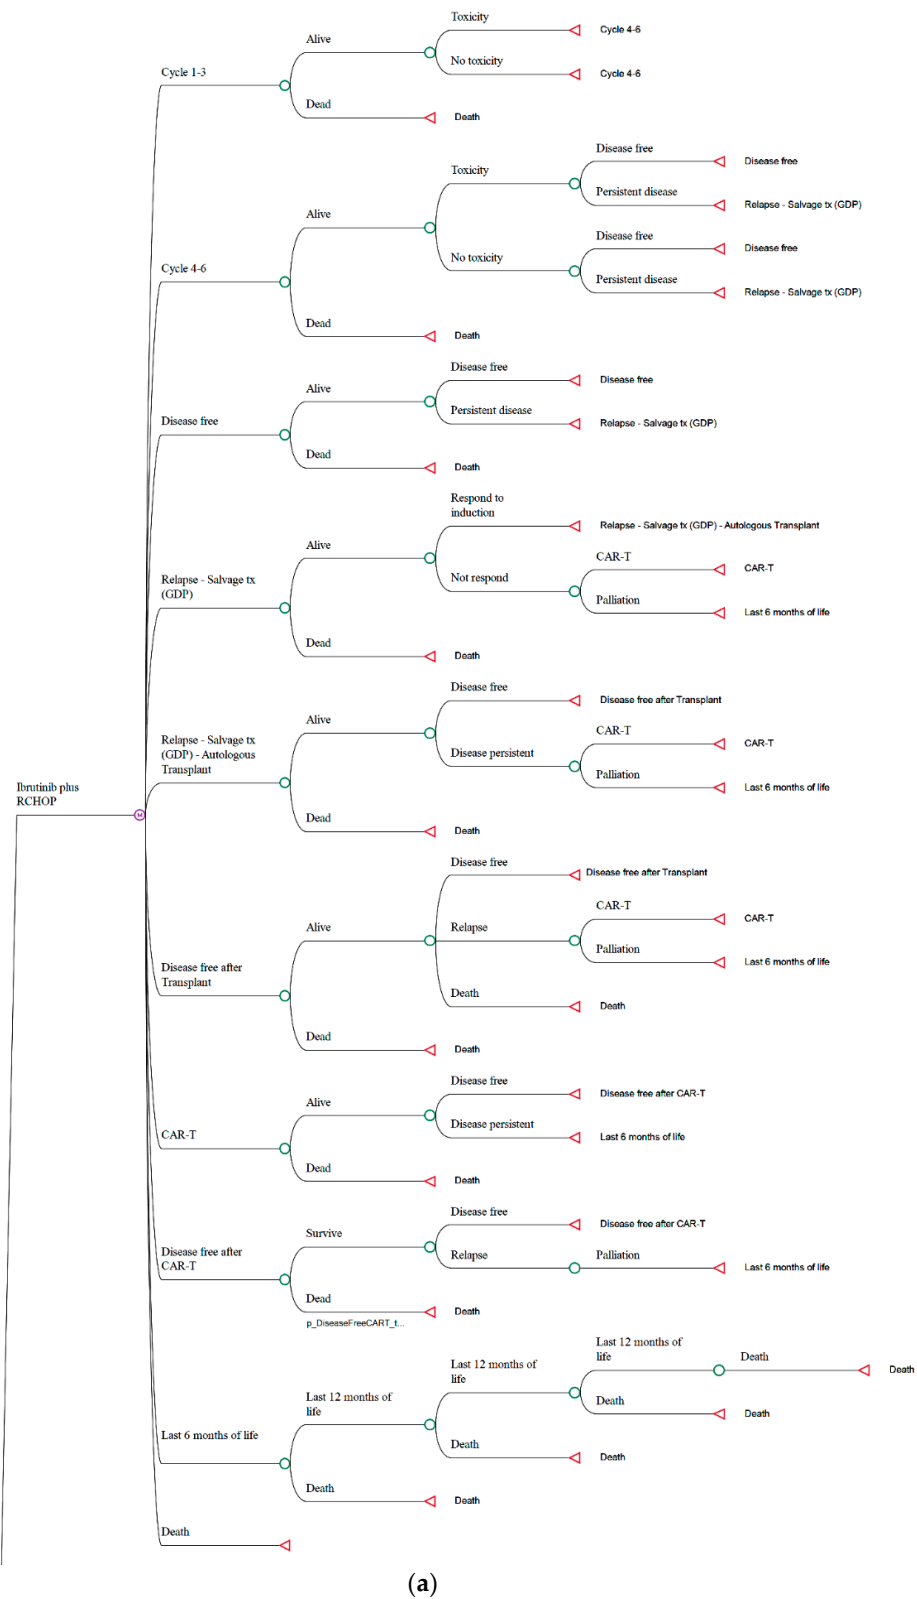

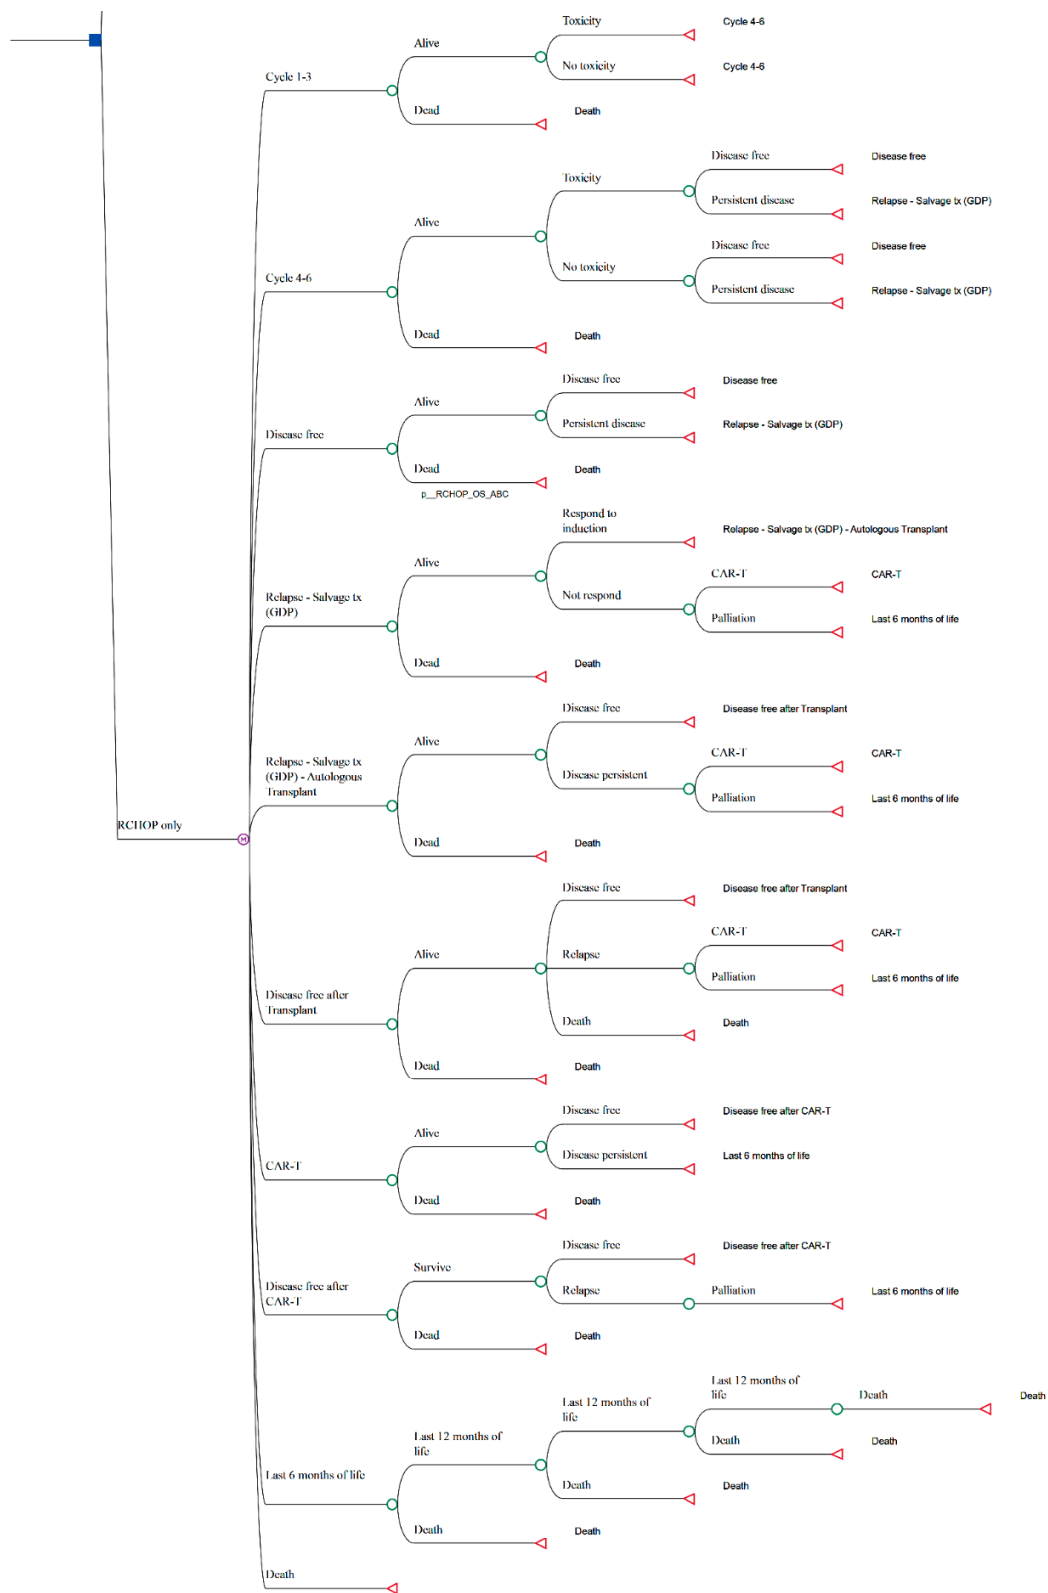

(b)

**Figure S1.** (a) Simplified Markov Model (I-RCHOP Arm). (b) Simplified Markov Model (RCHOP Arm).

**Table S1.** Cost estimates used in analysis

| Variable                                                                                                                                                                                        | Estimate | Low     | High    | References                   |
|-------------------------------------------------------------------------------------------------------------------------------------------------------------------------------------------------|----------|---------|---------|------------------------------|
| Inclusive of initial treatment, costs of physician visits, nursing costs, supportive medications (G-CSF, anti-emetics), overhead, cancer centre visits, laboratory investigations, PET-CT scans |          |         |         |                              |
| RCHOP (total cost for 6 cycles)                                                                                                                                                                 | 42,184   | 37,275  | 47,094  | [37,63–66]                   |
| I-RCHOP (total cost)                                                                                                                                                                            | 109,020  | 104,114 | 113,925 | [37,63–66]                   |
| Disease free period                                                                                                                                                                             |          |         |         |                              |
| Cost per 3 month cycle                                                                                                                                                                          | 361      | 278     | 443     | [66], Expert Opinion 2021    |
| Salvage Treatment                                                                                                                                                                               |          |         |         |                              |
| GDP (total cost)                                                                                                                                                                                | 1,687    | 1,324   | 2,094   | [66,67]                      |
| Autologous stem cell transplant (total cost, inclusive of GDP)                                                                                                                                  | 73,553   | 49,350  | 97,756  | [66–69]                      |
| CAR-T                                                                                                                                                                                           | 660,924  | 654,110 | 667,738 | [66,70]                      |
| Palliative Therapy                                                                                                                                                                              |          |         |         |                              |
| Comfort and supportive care in last 12 months of life per 3 month cycle                                                                                                                         | 10136    | 8926    | 11346   | [69,71], Expert Opinion 2021 |
| Toxicities                                                                                                                                                                                      |          |         |         |                              |
| Febrile Neutropenia                                                                                                                                                                             | 9,268    | 2,915   | 15,620  | [63,66,72]                   |
| Nausea                                                                                                                                                                                          | 472      | 64      | 881     | [64,66]                      |
| Gamma distributions were assumed for all cost modelling.                                                                                                                                        |          |         |         |                              |

**Table S2.** Health Utility Data

| Utility Description                                     | Utility | Low     | High    | References                   |
|---------------------------------------------------------|---------|---------|---------|------------------------------|
| Diagnosis and peri-treatment of DLBCL with RCHOP        | 0.79    | 0.693   | 0.891   | [73–76]                      |
| Complete Response RCHOP                                 | 0.82    | 0.729   | 0.913   | [73–76]                      |
| No Response RCHOP                                       | 0.435   | 0.342   | 0.539   | [73–76]                      |
| Diagnosis and peri-treatment of DLBCL with I-RCHOP      | 0.7505  | 0.65835 | 0.84645 | [73–76], Expert Opinion 2021 |
| Complete Response I-RCHOP                               | 0.779   | 0.69255 | 0.86735 | [73–76], Expert Opinion 2021 |
| No Response I-RCHOP                                     | 0.41325 | 0.3249  | 0.51205 | [73–76], Expert Opinion 2021 |
| Hospitalization for febrile neutropenia                 | 0.64    | 0.512   | 0.768   | [63,77]                      |
| GDP Salvage Treatment                                   | 0.734   | 0.5872  | 0.8808  | [78,79]                      |
| Receiving autologous stem cell transplant               | 0.43    | 0.344   | 0.516   | [69,80]                      |
| Post-transplantation                                    | 0.7     | 0.56    | 0.84    | [80]                         |
| Complete Response CAR-T                                 | 0.73    | 0.621   | 0.847   | [79,81]                      |
| Incurable DLBCL and Palliation                          | 0.435   | 0.342   | 0.539   | [69,82]                      |
| Beta distributions were assumed for all cost modelling. |         |         |         |                              |

## References

37. Ministry of Health Ontario. Schedule of Benefits: Physician Services Under the Health Insurance Act. Available online [https://www.health.gov.on.ca/en/pro/programs/ohip/sob/physserv/sob\\_master\\_20221201.pdf](https://www.health.gov.on.ca/en/pro/programs/ohip/sob/physserv/sob_master_20221201.pdf) (assessed on 14 October 2022)
63. Lathia, N.; Mittmann, N.; DeAngelis, C.; Knowles, S.; Cheung, M.; Piliotis, E.; Shear, N.; Walker, S. Evaluation of Direct Medical Costs of Hospitalization for Febrile Neutropenia. *Cancer* 2010, 116, 742–748.
64. Lachaine, J.; Yelle, L.; Kaizer, L.; Dufour, A.; Hopkins, S.; Deuson, R. Chemotherapy-Induced Emesis: Quality of Life and Economic Impact in the Context of Current Practice in Canada. *Support. Cancer Ther.* 2005, 2, 181–187. <https://doi.org/10.3816/SCT.2005.n.011>.
65. Best, J.H.; Hornberger, J.; Proctor, S.J.; Omnes, L.F.; Jost, F. Cost-Effectiveness Analysis of Rituximab Combined with Chop for Treatment of Diffuse Large B-Cell Lymphoma. *Value Health J.* 2005, 8, 462–470. <https://doi.org/10.1111/j.1524-4733.2005.00037.x>.
66. Ng, P.; Leung, F. Personal Communication. Inpatient Pharmacy, Princess Margaret Cancer Centre: Toronto, ON, Canada, 2021.
67. Moccia, A.A.; Hitz, F.; Hoskins, P.; Klasa, R.; Power, M.M.; Savage, K.J.; Shenkier, T.; Shepherd, J.D.; Slack, G.W.; Song, K.W.; et al. Gemcitabine, Dexamethasone, and Cisplatin (GDP) Is an Effective and Well-Tolerated Salvage Therapy for Re-lapsed/Refractory Diffuse Large B-Cell Lymphoma and Hodgkin Lymphoma. *Leuk Lymphoma* 2017, 58, 324–332. <https://doi.org/10.1080/10428194.2016.1193852>.
68. Vijenthira, A.; Kuruvilla, J.; Prica, A. Cost-Effectiveness Analysis of Allogeneic versus Autologous Stem Cell Trans-plant versus Chemo-Immunotherapy for Early Relapse of Follicular Lymphoma within 2 Years of Initial Therapy. *Bone Marrow Transplant* 2021, 56, 2400–2409. <https://doi.org/10.1038/s41409-021-01327-5>.
69. Vijenthira, A.; Chan, K.; Cheung, M.C.; Prica, A. Cost-Effectiveness of First-Line Treatment Options for Patients with Ad-vanced-Stage Hodgkin Lymphoma: A Modelling Study. *Lancet Haematol* 2020, 7, e146–e156. [https://doi.org/10.1016/S2352-3026\(19\)30218-2](https://doi.org/10.1016/S2352-3026(19)30218-2).
70. Axicabtagene Ciloleucel for Diffuse Large B-Cell Lymphoma: Economic Review Report, 2019. <https://www.cadth.ca/sites/default/files/pdf/car-t/ct0002-axicabtagene-ciloleucel-economic-report-redacted.pdf>. (accessed on 14 October 2022)
71. Yu, M.; Guerriere, D.N.; Coyte, P.C. Societal Costs of Home and Hospital End-of-Life Care for Palliative Care Pa-tients in Ontario, Canada. *Health Soc. Care* 2015, 23, 605–618. <https://doi.org/10.1111/hsc.12170>.
72. Canadian Agency for Drugs and Technologies in Health. Filgrastin (Grastofil - Apotex Inc.). CADTH Canadian Drug Expert Committee Final Recommendation. Available online [https://www.cadth.ca/sites/default/files/cdr/complete/SE0446\\_cdr\\_complete\\_Grastofil\\_March-22-16\\_e.pdf](https://www.cadth.ca/sites/default/files/cdr/complete/SE0446_cdr_complete_Grastofil_March-22-16_e.pdf) (assessed on 14 October 2022)
73. Knight, C.; Hind, D.; Brewer, N.; Abbott, V. Rituximab (MabThera) for Aggressive Non-Hodgkin’s Lymphoma: A System-atic Review and Economic Evaluation. *Health Technol. Assess.* 2004, 8, 1–82. <https://doi.org/10.3310/hta8370>.
74. Oerlemans, S.; Issa, D.E.; van den Broek, E.C.; Nijziel, M.R.; Coebergh, J.W.W.; Huijgens, P.C.; Mols, F.; van de Poll-Franse, L.V. Health-Related Quality of Life and Persistent Symptoms in Relation to (R-)CHOP14, (R-)CHOP21, and Other Therapies among Patients with Diffuse Large B-Cell Lymphoma: Results of the Population-Based PHAROS-Registry. *Ann. Hematol.* 2014, 93, 1705–1715. <https://doi.org/10.1007/s00277-014-2099-8>.
75. Wang, H.; Manca, A.; Crouch, S.; Bagguley, T.; Yu, G.; Aas, E.; Howell, D.; Burton, C.; Patmore, R.; Roman, E.; et al. Health-State Utility Values in Diffuse Large B-Cell Lymphoma. *Value Health* 2018, 21, S74. <https://doi.org/10.1016/j.jval.2018.09.433>.
76. Golicki, D.; Jaśkowiak, K.; Wójcik, A.; Młyńczak, K.; Dobrowolska, I.; Gawrońska, A.; Basak, G.; Snarski, E.; Hołownia-Voloskova, M.; Jakubczyk, M.; et al. EQ-5D–Derived Health State Utility Values in Hematologic Malignancies: A Catalog of 796 Utilities Based on a Systematic Review. *Value Health* 2020, 23, 953–968. <https://doi.org/10.1016/j.jval.2020.04.1825>.
77. Lathia, N.; Isogai, P.K.; Angelis, C.D.; Smith, T.J.; Cheung, M.; Mittmann, N.; Hoch, J.S.; Walker, S. Cost-Effectiveness of Fil-grastim and Pegfilgrastim as Primary Prophylaxis Against Febrile Neutropenia in Lym-phoma Patients. *JNCI J. Natl. Cancer Inst.* 2013, 105, 1078–1085. <https://doi.org/10.1093/jnci/djt182>.
78. Cheung, M.C.; Hay, A.E.; Crump, M.; Imrie, K.R.; Song, Y.; Hassan, S.; Risebrough, N.; Sussman, J.; Couban, S.; MacDonald, D.; et al. Gemcitabine/Dexamethasone/Cisplatin vs Cytarabine/Dexamethasone/Cisplatin for Relapsed or Refractory Ag-gressive-Histology Lymphoma: Cost-Utility Analysis of NCIC CTG LY.12. *JNCI J. Natl. Cancer Inst.* 2015, 107, djv106. <https://doi.org/10.1093/jnci/djv106>.

79. Ellis, K. Cost-Effectiveness of Chimeric Antigen Receptor T-Cell Therapy for Treating Large B- Cell Lymphoma Patients in Canada. Master's Thesis, The University of Waterloo, Waterloo, ON, Canada, 2019.
80. Frödin, U.; Börjeson, S.; Lyth, J.; Lotfi, K. A Prospective Evaluation of Patients' Health-Related Quality of Life during Au-to-SCT: A 3-Year Follow-Up. *Bone Marrow Transplant* 2011, 46, 1345–1352. <https://doi.org/10.1038/bmt.2010.304>.
81. Howell, T.A.; Matza, L.S.; Jun, M.P.; Garcia, J.; Powers, A.; Maloney, D.G. Health State Utilities for Adverse Events Associated with Chimeric Antigen Receptor T-Cell Therapy in Large B-Cell Lymphoma. *Pharm. Open* 2022, 6, 367–376. <https://doi.org/10.1007/s41669-021-00316-0>.
82. Wu, H.; Lin, P.; Yang, S.; Zhang, W.; Tao, W. Cost-Utility Analysis of Palliative Care in Patients with Advanced Cancer: A Retrospective Study. *BMC Palliat. Care* 2021, 20, 126. <https://doi.org/10.1186/s12904-021-00816-0>.
